# Supplementary material for: The Laboratory Course Assessment Survey: A Tool to Measure Three Dimensions of Research-Course Design
Source: PubMed Central journal article supplement — CBE Life Sci Educ. 2015 Dec 1;14(4):ar37. doi: 10.1187/cbe.15-03-0073 (PMC4710398; doi:10.1187/cbe.15-03-0073), 2015-12-01
Supplement: supp_14.4.ar37_CombinedSupMats.pdf [file supp_14.4.ar37_CombinedSupMats.pdf]

# Supplemental Material

*CBE—Life Sciences Education*

Corwin *et al.*
